# Supplementary material for: Light Spectrum Effects on the Ions, and Primary and Secondary Metabolites of Red Beets (Beta vulgaris L.)
Source: MDPI journal article supplement (doi:10.3390/agronomy12071699), 2022-07-18
Supplement: s1 [file s1]

### A. LED Chipset (Red)

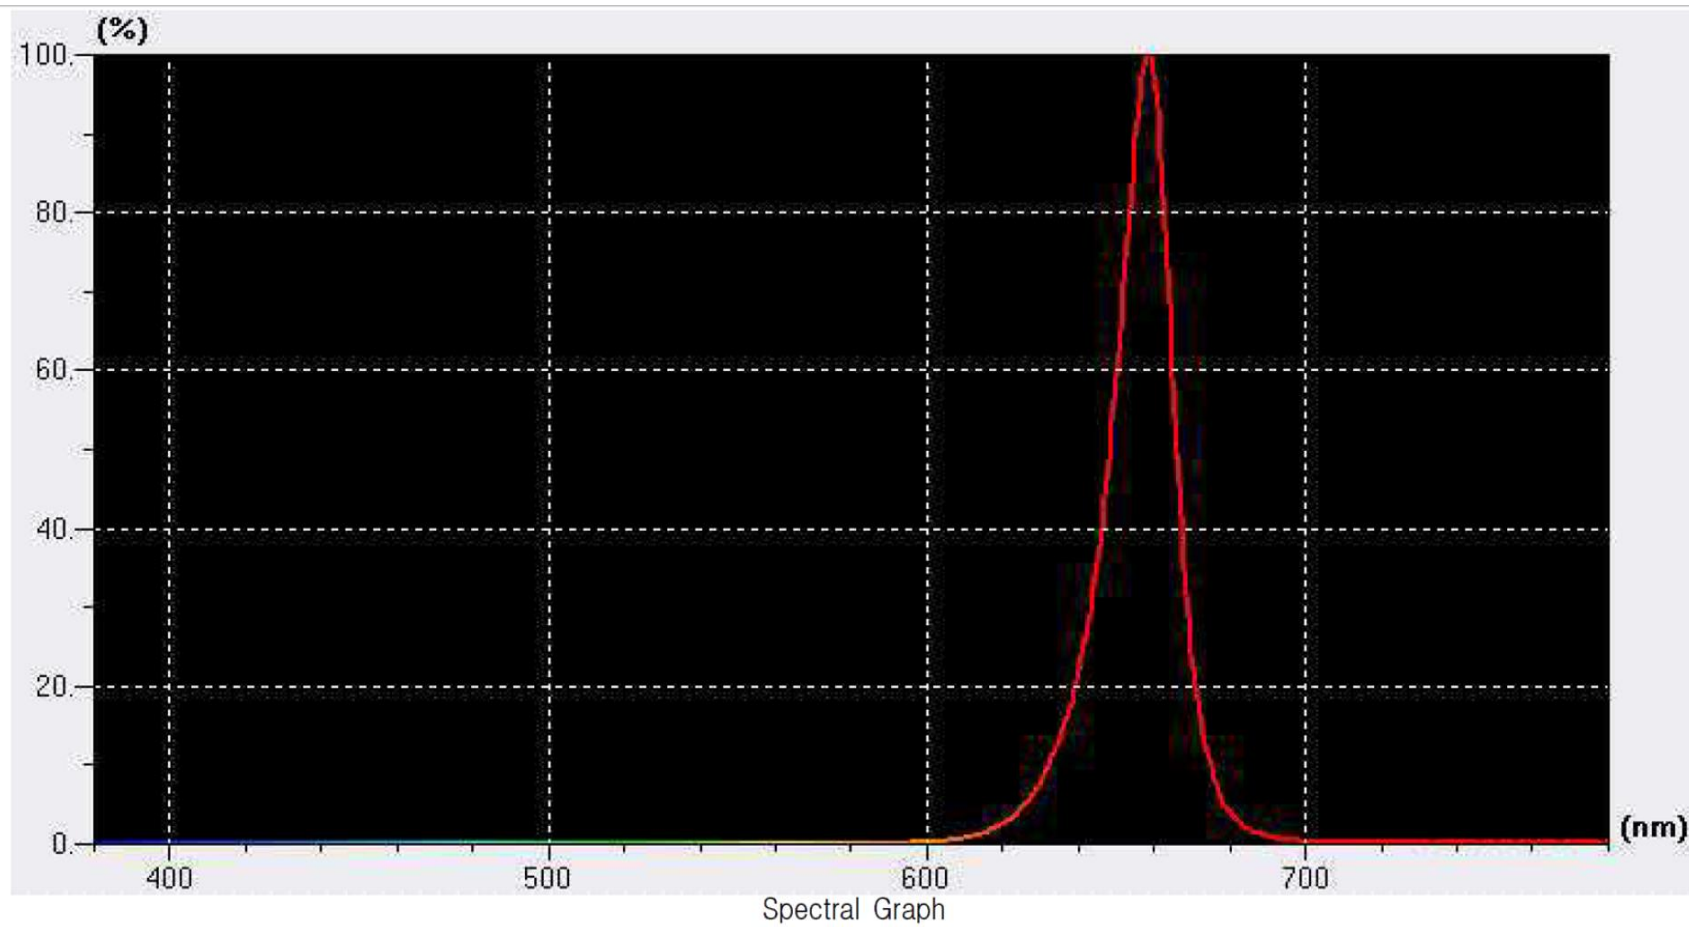

- (RBN10SC, KAST Engineering, South Korea)
- Intensity: 800~1000 mcd

## B. LED Chipset (Blue)

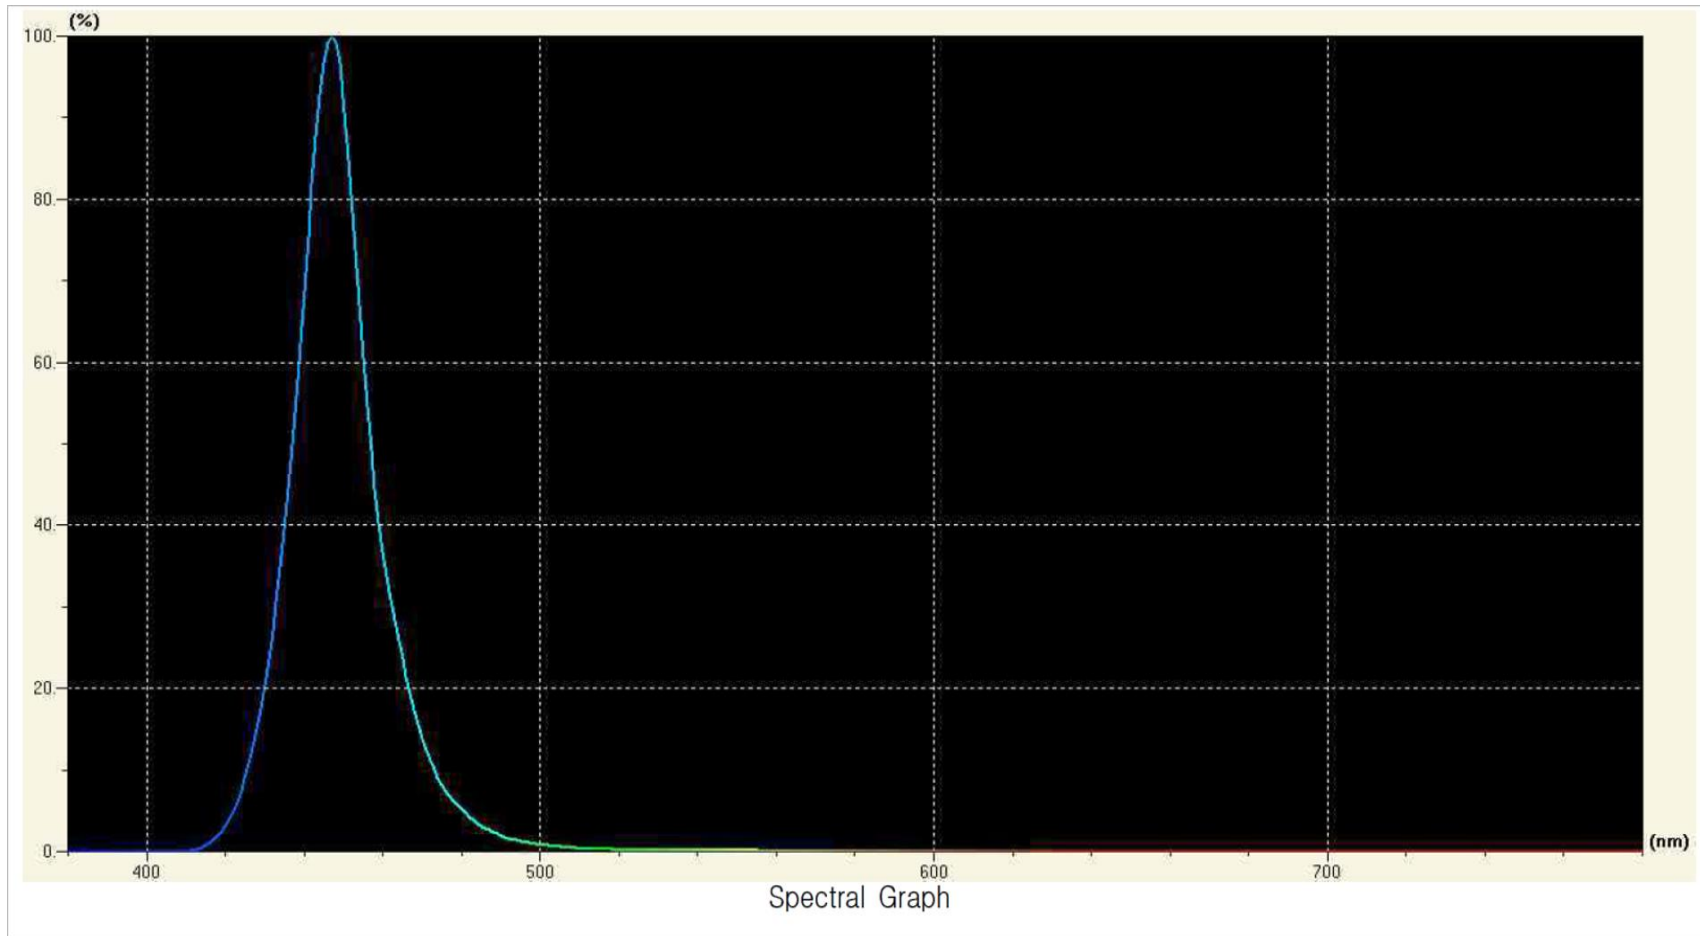

- (BBN10SC, KAST Engineering, South Korea)
- Intensity: 700~900 mcd

### C. LED Chipset (Warm White)

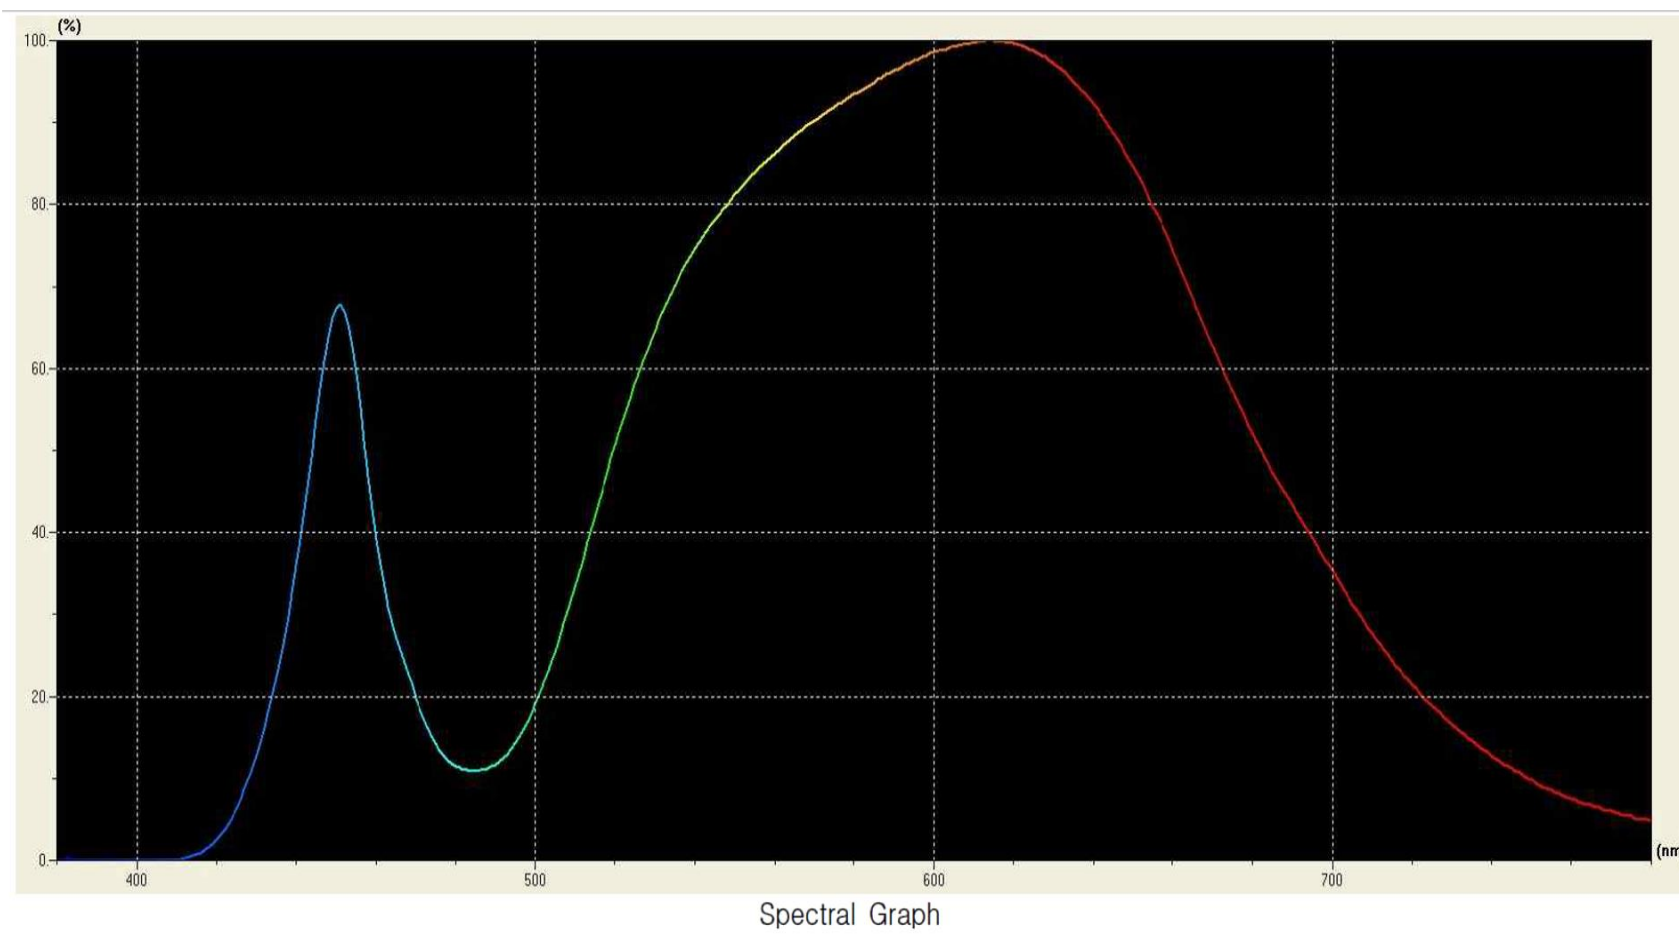

- (WWCN10SC, KAST Engineering, South Korea)
- Intensity: 4000~7000 mcd

Figure S1. Spectral distributions of LED chipsets that red (A), blue (B) and warm white (C).
